# Supplementary material for: The impact of plug-in fragrance diffusers on residential indoor VOC concentrations
Source: Royal Society of Chemistry journal article supplement (doi:10.1039/d2em00444e), 2023-01-01

Electronic Supplementary Information

Figure 1 – flow schematic showing GCFIDQMS instrument setup

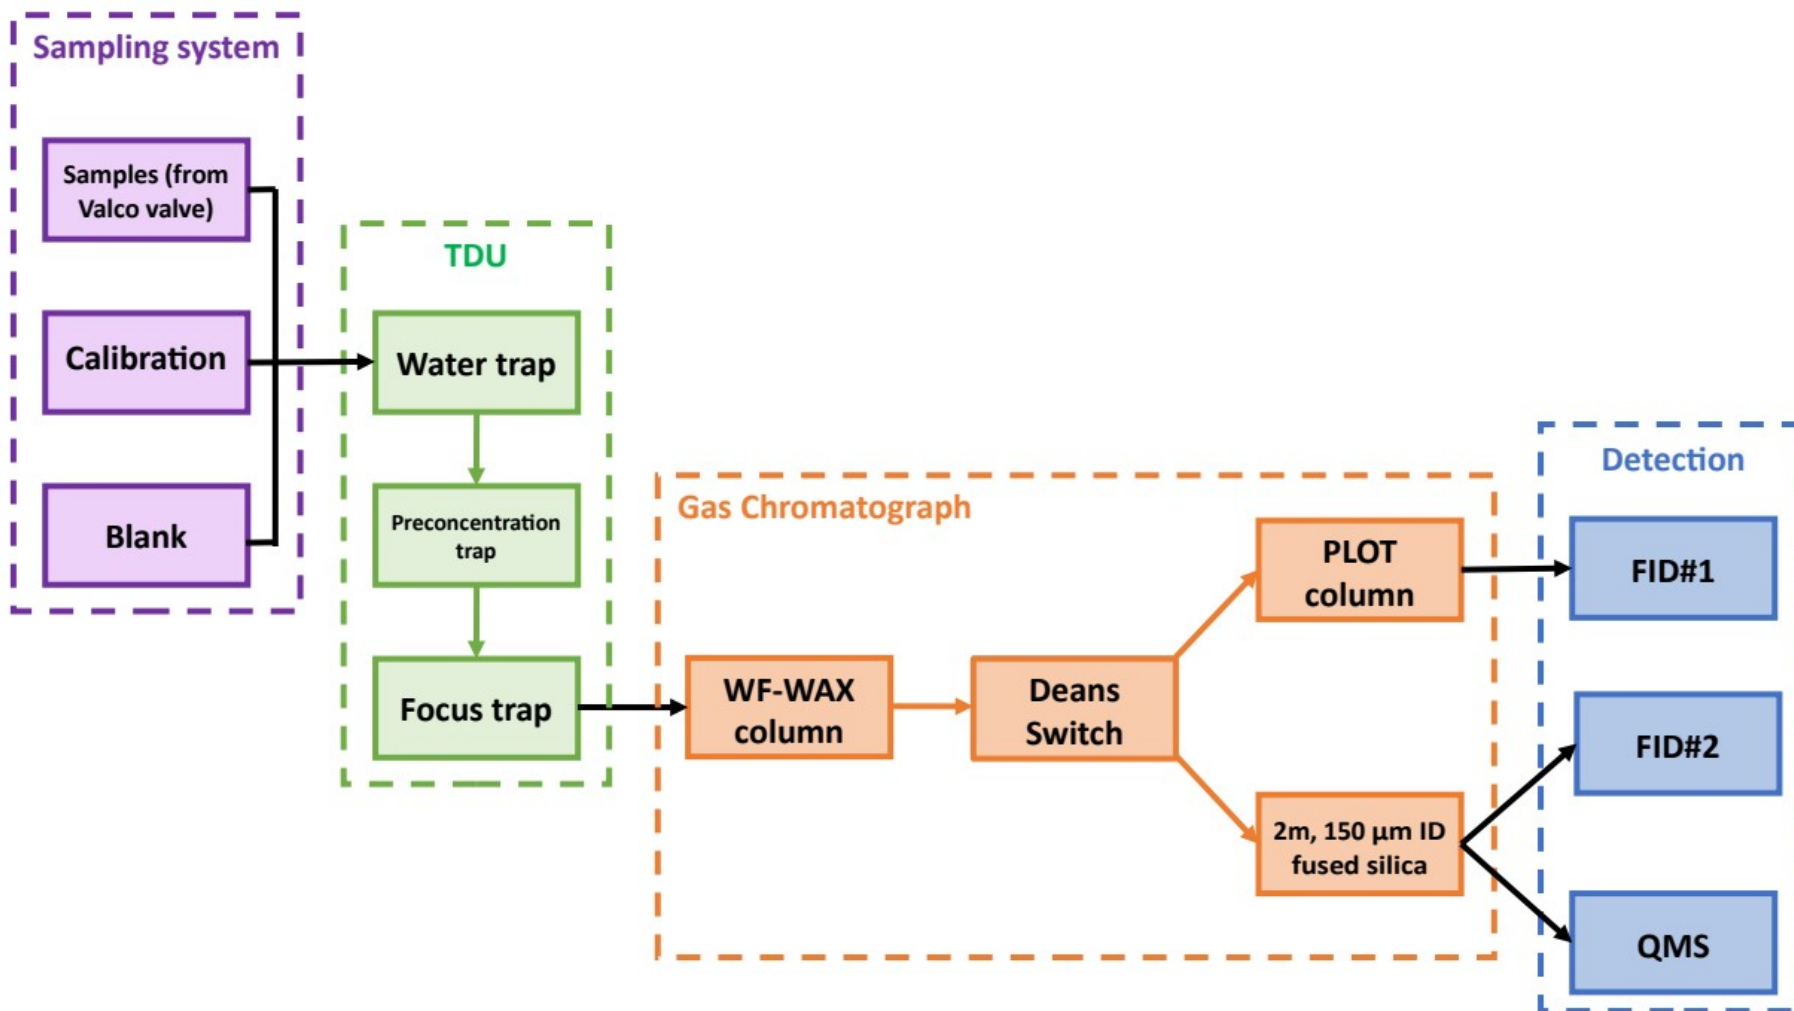

Figure 2 – table showing the list of species quantified and the quantification method used.

| <b>Species name</b>    | <b>Quantification method</b>                        |
|------------------------|-----------------------------------------------------|
| Ethane                 | Direct calibration using NPL 30                     |
| Ethene                 | Direct calibration using NPL 30                     |
| Propane                | Direct calibration using NPL 30                     |
| Propene                | Direct calibration using NPL 30                     |
| iso-butane             | Direct calibration using NPL 30                     |
| n-butane               | Direct calibration using NPL 30                     |
| Acetylene              | Direct calibration using NPL 30                     |
| But-1-ene              | Direct calibration using NPL 30                     |
| cis-but-2-ene          | Direct calibration using NPL 30                     |
| isopentane             | Direct calibration using NPL 30                     |
| n-pentane              | Direct calibration using NPL 30                     |
| cis-pent-2-ene         | Direct calibration using NPL 30                     |
| n-hexane               | Direct calibration using NPL 30                     |
| Isoprene               | Direct calibration using NPL 30                     |
| n-heptane              | Direct calibration using NPL 30                     |
| n-octane               | Direct calibration using NPL 30                     |
| Ethylbenzene           | Direct calibration using NPL 30                     |
| m-xylene               | Direct calibration using NPL 30                     |
| o-xylene               | Direct calibration using NPL 30                     |
| 1,3,5-trimethylbenzene | Direct calibration using NPL 30                     |
| 1,2,4-trimethylbenzene | Direct calibration using NPL 30                     |
| 1,2,3-trimethylbenzene | Direct calibration using NPL 30                     |
| Benzene                | Direct calibration using NPL 30                     |
| Toluene                | Direct calibration using NPL 30                     |
| Styrene                | Equivalent carbon number using toluene as reference |
| Acetone                | Equivalent carbon number using toluene as reference |
| Acetaldehyde           | Equivalent carbon number using toluene as reference |
| Hexanal                | Equivalent carbon number using toluene as reference |
| Butan-2-one            | Equivalent carbon number using toluene as reference |
| Methanol               | Equivalent carbon number using toluene as reference |
| Benzaldehyde           | Equivalent carbon number using toluene as reference |
| Ethanol                | Equivalent carbon number using toluene as reference |
| Ethyl acetate          | Equivalent carbon number using toluene as reference |
| Butyl acetate          | Equivalent carbon number using toluene as reference |
| Propyl acetate         | Equivalent carbon number using toluene as reference |
| Acetonitrile           | Equivalent carbon number using toluene as reference |
| Dichloromethane        | Equivalent carbon number using toluene as reference |
| $\alpha$ -pinene       | Equivalent carbon number using toluene as reference |
| $\beta$ -pinene        | Equivalent carbon number using toluene as reference |
| D-limonene             | Equivalent carbon number using toluene as reference |
| Eucalyptol             | Equivalent carbon number using toluene as reference |
| $\beta$ -terpinene     | Equivalent carbon number using toluene as reference |
| $\gamma$ -terpinene    | Equivalent carbon number using toluene as reference |
| $\delta$ -terpinene    | Equivalent carbon number using toluene as reference |
| 3-carene               | Equivalent carbon number using toluene as reference |
| $\beta$ -myrcene       | Equivalent carbon number using toluene as reference |
| p-cymene               | Equivalent carbon number using toluene as reference |

Figure 3a – Porous layer open tubular (PLOT) column elutions of a canister air sample with signal strength/response units on y-axis and retention time (RT)/acquisition time on x-axis. The first three signals from the left show a split ethane signal starting at roughly RT 9min and ending at roughly RT 10.2min, ethene signal just before RT 11min, and a split propane signal starting at roughly RT 12min and finishing at roughly RT 13min.

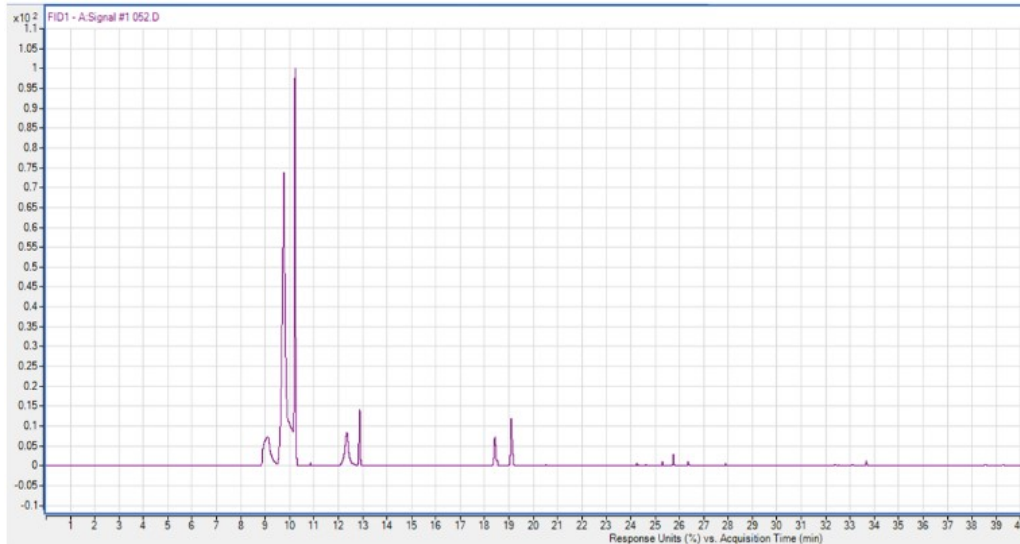

Figure 3b – The same canister sample run in Fig. A run a second time, showing better signal responses and resolution. Only data obtained from Fig. B was used in data workup.

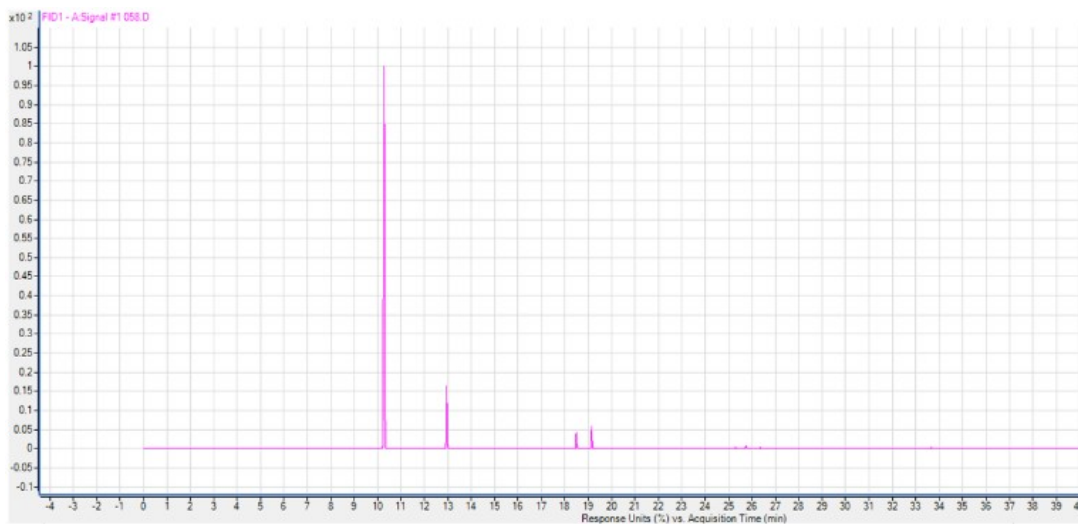

Figure 4 – images showing the plug-in diffuser used in this study. It consists of a standard UK three-pin plug, and a small tank containing the fragrance oil and wick, covered with a fascia plate.

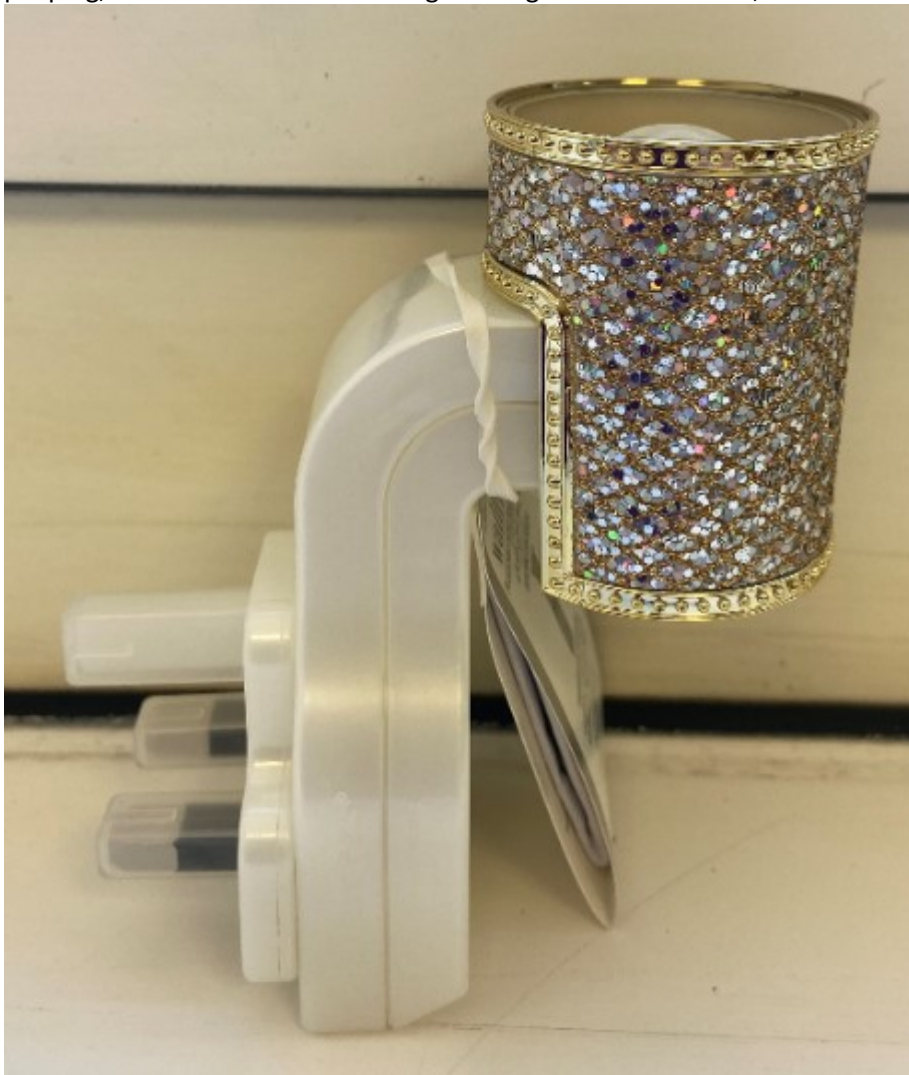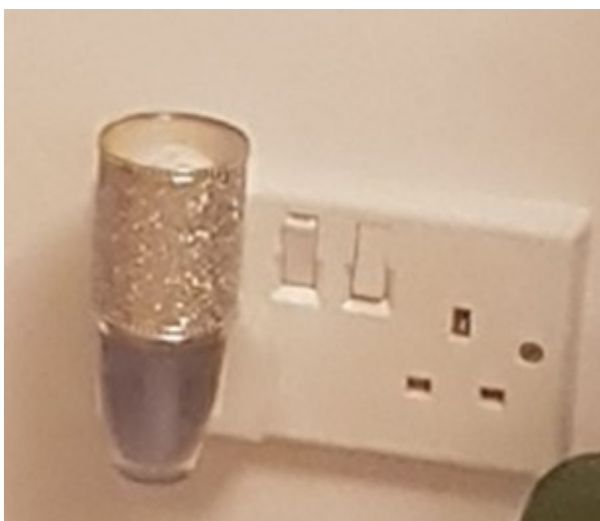

Figure 5 – the questions presented in the iPad-based questionnaire given to participants to fill out each day during each sampling period

## **All Questions**

**Thank you for volunteering to take part in this test**

**Please read the instructions carefully on the next page before starting the test**

# **Indoor Atmosphere Survey**

**The results of this survey will remain completely anonymous to any third party. Please answer all questions in this short survey. The Canister ID is located on the canister itself, please enter the ID in the box below, so we can link the measurements to the data you provide here.**

**1: Full Name**

---

**2: Please enter your Canister ID: ( this is the number on the white label titled serial number)**

---

## **Section I – Building Environment**

**3: Number of bedrooms in your house:**

- Studio
- 1
- 2
- 3
- 4

5+

**4: Property Type:**

Studio/Apartment

Terraced

Semi-Detached

Detached

**5: Property Era:**

Victorian or earlier

1920's - 1930's

1940's - 1950's

1960's - 1970's

1980's - 2000's

2000+

**6: Do you have a garage built into your property?**

Yes

No

**7: Is your home mostly**

Single Glazed

Double/Triple Glazed

## **Demographic Information**

**In this section please provide some basic information on the people in your household.**

**When giving details you (the person completing the form) is Resident 1.**

**8: Number of residents living in your house:**

- 1
- 2
- 3
- 4
- 5+

**Resident 1 (person completing the form)**

**9: Please select your Gender**

- Male
- Female
- Prefer not to say

**10: Please select the age category for each member of the household**

- Under 18
- 18 - 30
- 31 - 45
- 46 - 60
- 61 - 75
- 75+

**Resident 1 (person completing the form)**

**11: Please select Gender for Resident 1**

- Male
- Female
- Prefer not to say

**12: Please select the age category for Resident 1**

- Under 18
- 18 - 30
- 31 - 45
- 46 - 60

- 61 - 75
- 75+

**Resident 2**

**13: Please select Gender for Resident 2**

- Male
- Female
- Prefer not to say

**14: Please select the age category for Resident 2**

- Under 18
- 18 - 30
- 31 - 45
- 46 - 60
- 61 - 75
- 75+

**Resident 1 (person completing the form)**

**15: Please select Gender for Resident 1**

- Male
- Female
- Prefer not to say

**16: Please select the age category for Resident 1**

- Under 18
- 18 - 30
- 31 - 45
- 46 - 60
- 61 - 75
- 75+



## **Resident 2**

**17: Please select Gender for Resident 2**

- Male
- Female
- Prefer not to say

**18: Please select the age category for Resident 2**

- Under 18
- 18 - 30
- 31 - 45
- 46 - 60
- 61 - 75
- 75+

## **Resident 3**

**19: Please select Gender for Resident 3**

- Male
- Female
- Prefer not to say

**20: Please select the age category for Resident 3**

- Under 18
- 18 - 30
- 31 - 45
- 46 - 60
- 61 - 75
- 75+

## **Resident 1 (person completing the form)**

**21: Please select Gender for Resident 1**

- Male
- Female
- Prefer not to say

**22: Please select the age category for Resident 1**

- Under 18
- 18 - 30
- 31 - 45
- 46 - 60
- 61 - 75
- 75+

**Resident 2**

**23: Please select Gender for Resident 2**

- Male
- Female
- Prefer not to say

**24: Please select the age category for Resident 2**

- Under 18
- 18 - 30
- 31 - 45
- 46 - 60
- 61 - 75
- 75+

**Resident 3**

**25: Please select Gender for Resident 3**

- Male
- Female
- Prefer not to say

**26: Please select the age category for Resident 3**

- Under 18
- 18 - 30
- 31 - 45
- 46 - 60
- 61 - 75
- 75+

**Resident 4**

**27: Please select your Gender**

- Male
- Female
- Prefer not to say

**28: Please select the age category for each member of the household**

- 18 - 30
- 31 - 45
- 46 - 60
- 61 - 75
- 75+

**Resident 1 (person completing the form)**

**29: Please select Gender for Resident 1**

- Male
- Female
- Prefer not to say

**30: Please select the age category for Resident 1**

- Under 18

- 18 - 30
- 31 - 45
- 46 - 60
- 61 - 75
- 75+

## **Resident 2**

### **31: Please select Gender for Resident 2**

- Male
- Female
- Prefer not to say

### **32: Please select the age category for Resident 2**

- Under 18
- 18 - 30
- 31 - 45
- 46 - 60
- 61 - 75
- 75+

## **Resident 3**

### **33: Please select Gender for Resident 3**

- Male
- Female
- Prefer not to say

### **34: Please select the age category for Resident 3**

- Under 18
- 18 - 30
- 31 - 45
- 46 - 60

61 - 75

75+

#### **Resident 4**

**35: Please select your Gender**

Male

Female

Prefer not to say

**36: Please select the age category for each member of the household**

18 - 30

31 - 45

46 - 60

61 - 75

75+

#### **Resident 5**

**37: Please select your Gender**

Male

Female

Prefer not to say

**38: Please select the age category for each member of the household**

18 - 30

31 - 45

46 - 60

61 - 75

75+

**39: Do you, or does anyone in your household, smoke or use e-cigarettes/Vaping (even if only outside)?**

Yes

No

## Section 2 – Domestic Fuel Use

40: Please indicate below the type of Heating that you currently use in your house:

| Wood Stove               | Coal                     | Log Burner               | Other Solid fuel (please specify in the box provided below) | Gas central heating      | Electric central heating | Oil central heating      | LPG central heating      |
|--------------------------|--------------------------|--------------------------|-------------------------------------------------------------|--------------------------|--------------------------|--------------------------|--------------------------|
| <input type="checkbox"/> | <input type="checkbox"/> | <input type="checkbox"/> | <input type="checkbox"/>                                    | <input type="checkbox"/> | <input type="checkbox"/> | <input type="checkbox"/> | <input type="checkbox"/> |

41: If you stated 'other solid fuel' - please specify below which you use.

---

---

---

42:

Please indicate below the type of fuel that you currently use in your house for cooking:

| Gas                      | Electric                 | Solid fuel (please specify in the box provided below) |
|--------------------------|--------------------------|-------------------------------------------------------|
| <input type="checkbox"/> | <input type="checkbox"/> | <input type="checkbox"/>                              |

43: Solid fuel - please specify below:

---

---

---

## Section 3 – Consumer Product Use

**In this section please indicate the number of times that each of the below products has been used during the day. This relates to all people within the household. i.e total use of products by all residents in the home.**

**If you have not used the type of product indicated, please put a '0' in the corresponding box.**

### **44: Personal Care Products**

Antiperspirant/Deodorant

Aftershave/Perfume

Hairspray

### **48: Household Products**

Air fresheners sprays

Plug-in air fresheners (please indicate the number of devices you have switched on)

Cleaning sprays

Furniture polishes

Insecticides / fly spray

Candles

### **55: Solvent Products**

Paints (gloss or water based)

Glues

**59: Have you cut flowers/flowers in bloom in your house today?**

Yes

No

**60:**

**Have you or anyone else in your household smoked or used E-Cigarettes or Vape even if ONLY outside during the day?**

Yes

No

**Many thanks for your help in completing this survey.**

**Please 'submit' your answers.**



Figure 6 – Boxplots showing different species concentration values, aggregated across all houses and separated by diffuser status. The y-axis has been transformed to a  $\log_{10}$  scale to aid presentation.

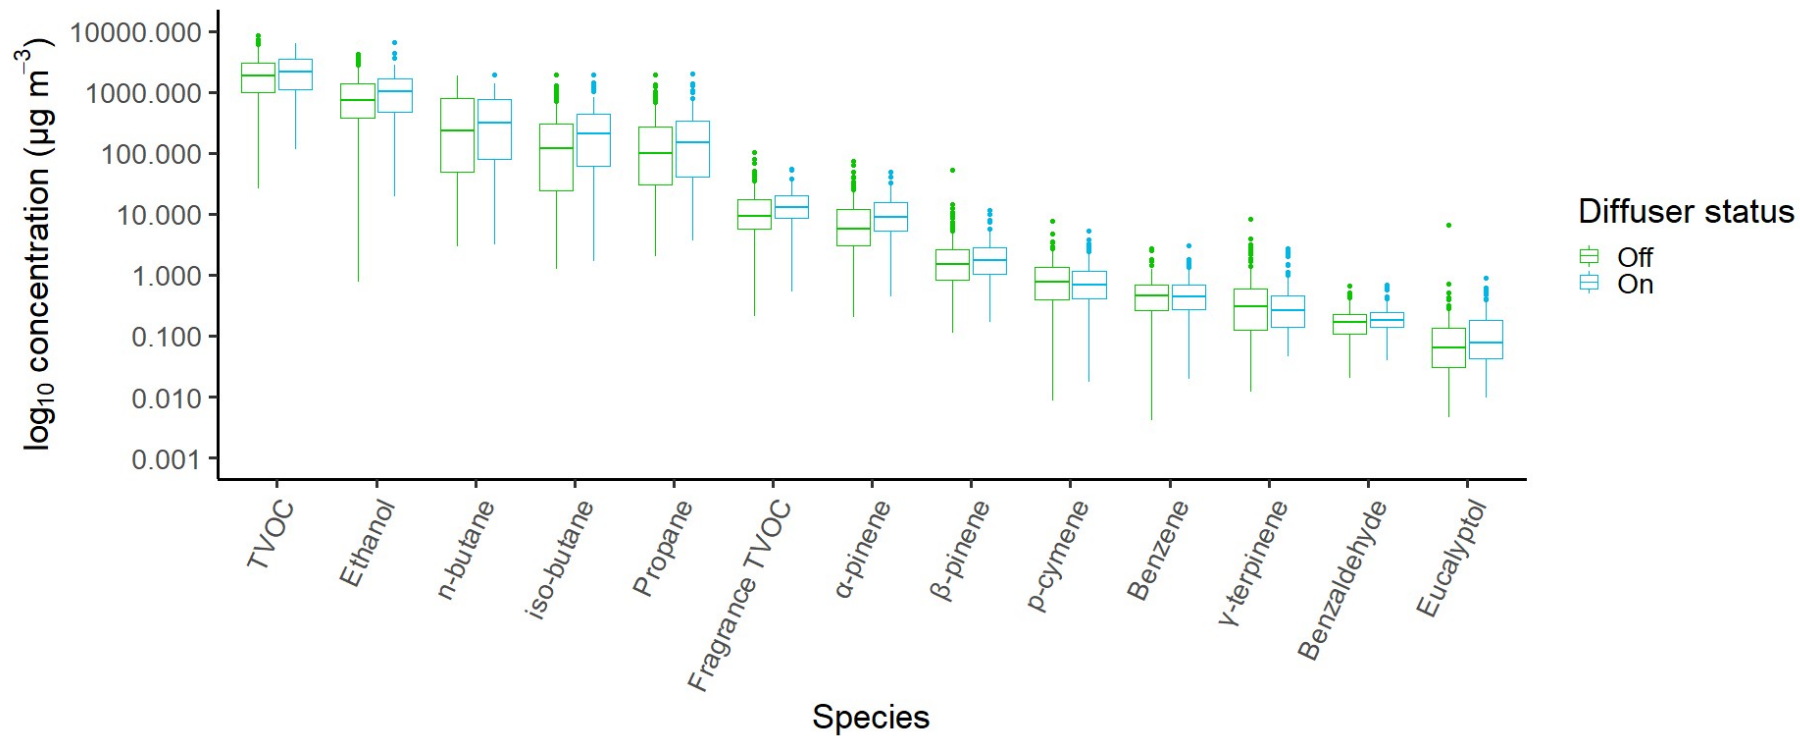

Figure 7(a) – correlation matrix showing inter-VOC correlations when the diffuser was off. A forward slanting blue line indicates a positive correlation, a full circle indicates no correlation, and a backward slanting red line indicates a negative correlation. A more intense colour and a narrower line indicates a stronger correlation.

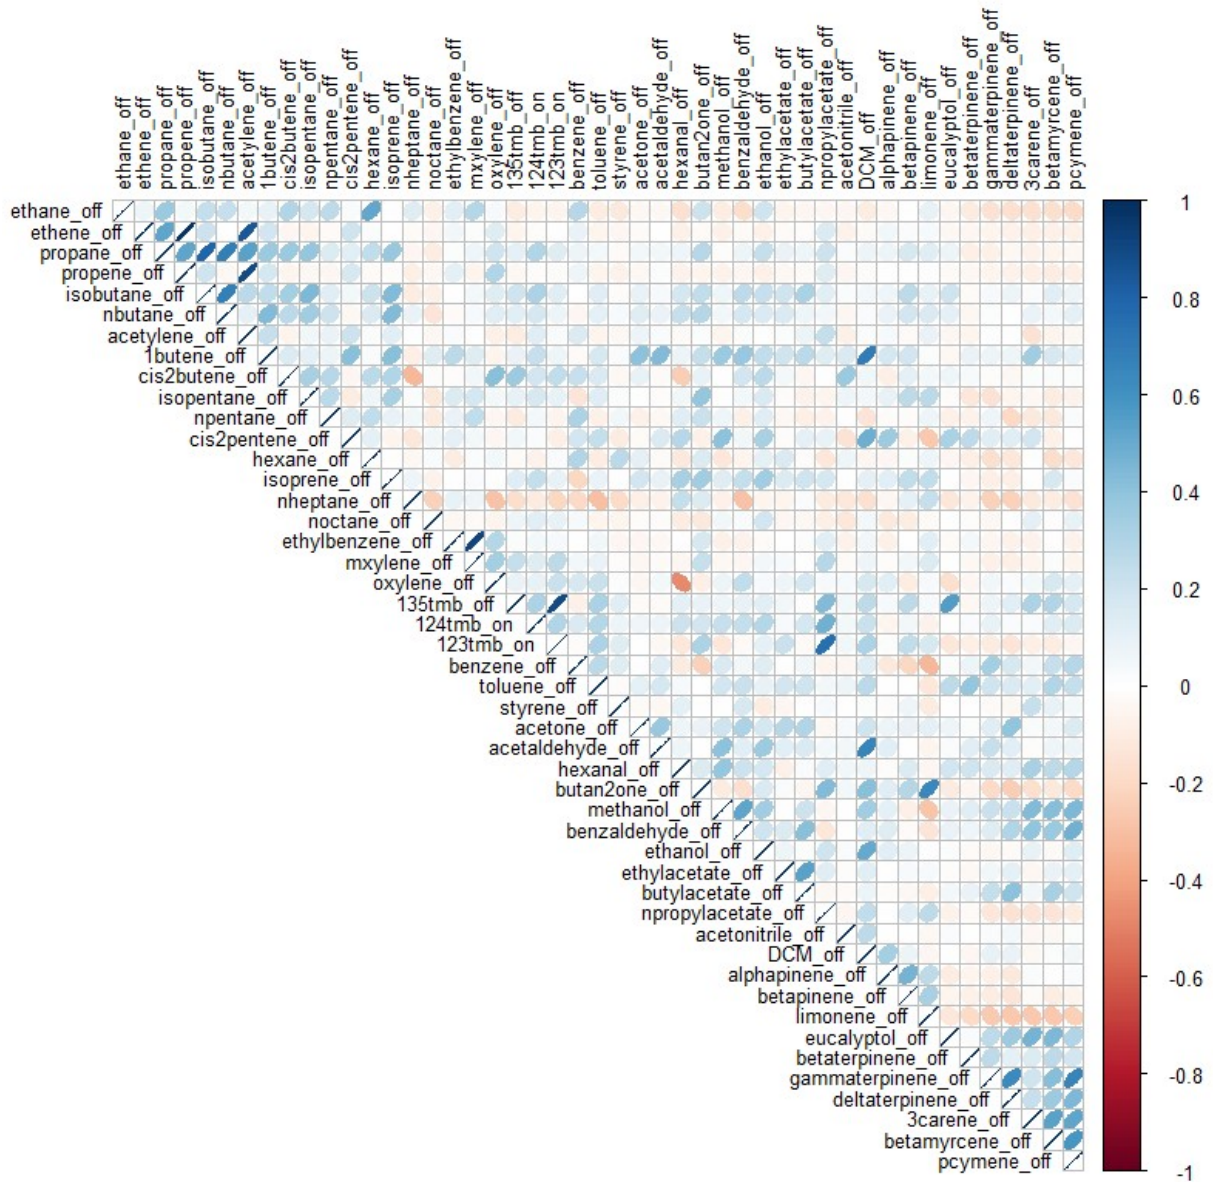

Figure 7(b) - correlation matrix showing inter-VOC correlations when the diffuser was on. A forward slanting blue line indicates a positive correlation, a full circle indicates no correlation, and a backward slanting red line indicates a negative correlation. A more intense colour and a narrower line indicates a stronger correlation.

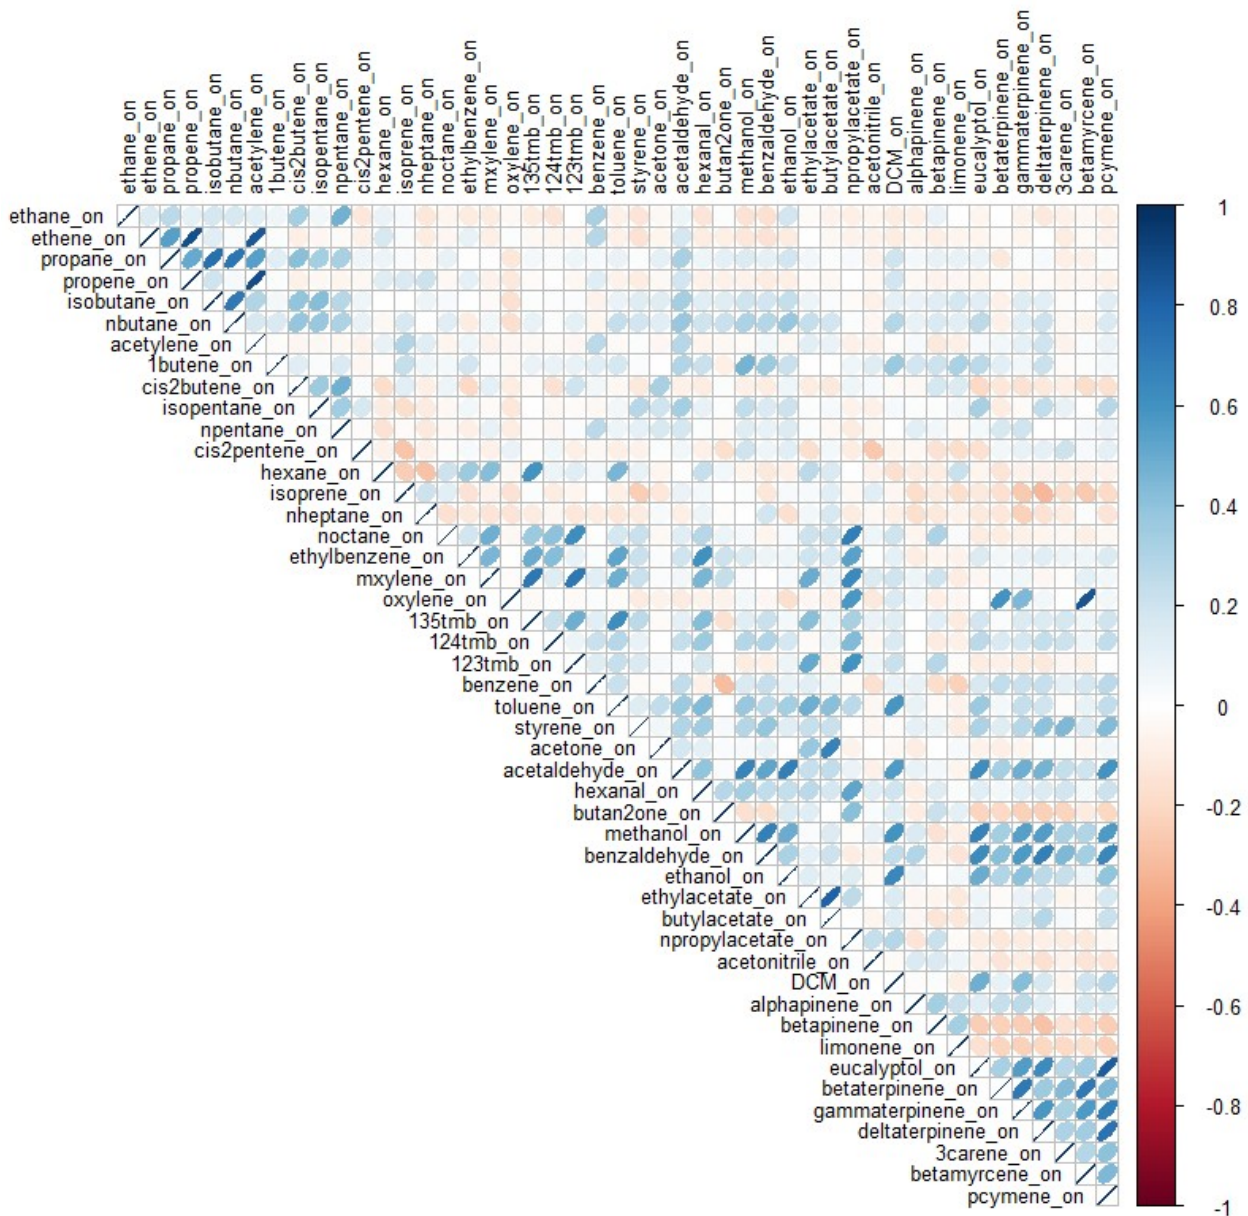

Figure 8 – plots showing the mean changes in concentration separated by diffuser status. Plots were made treating each house as a separate series of samples.

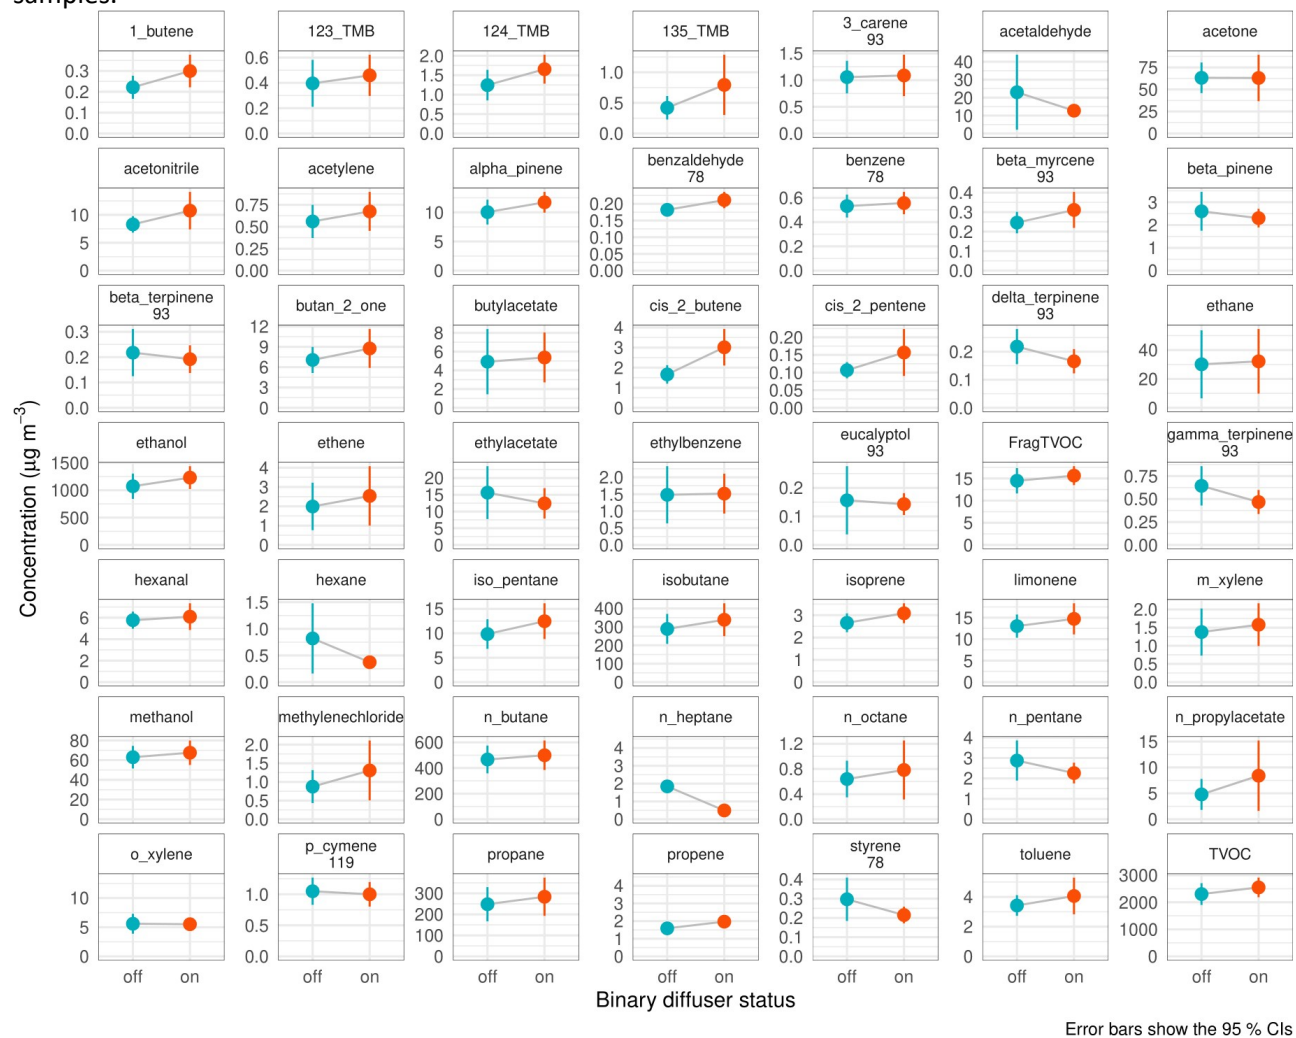

Figure 9 – total product use over each sample period plotted against TVOC concentrations for the sample taken during the same period, split into quantiles based on baseline TVOC concentrations. Q1 contains the houses with the 25% highest baseline TVOC concentrations, indicative of the 25% lowest AER, and Q4 contains the houses with the 25% lowest baseline TVOC concentrations, indicative of the 25% highest AER.

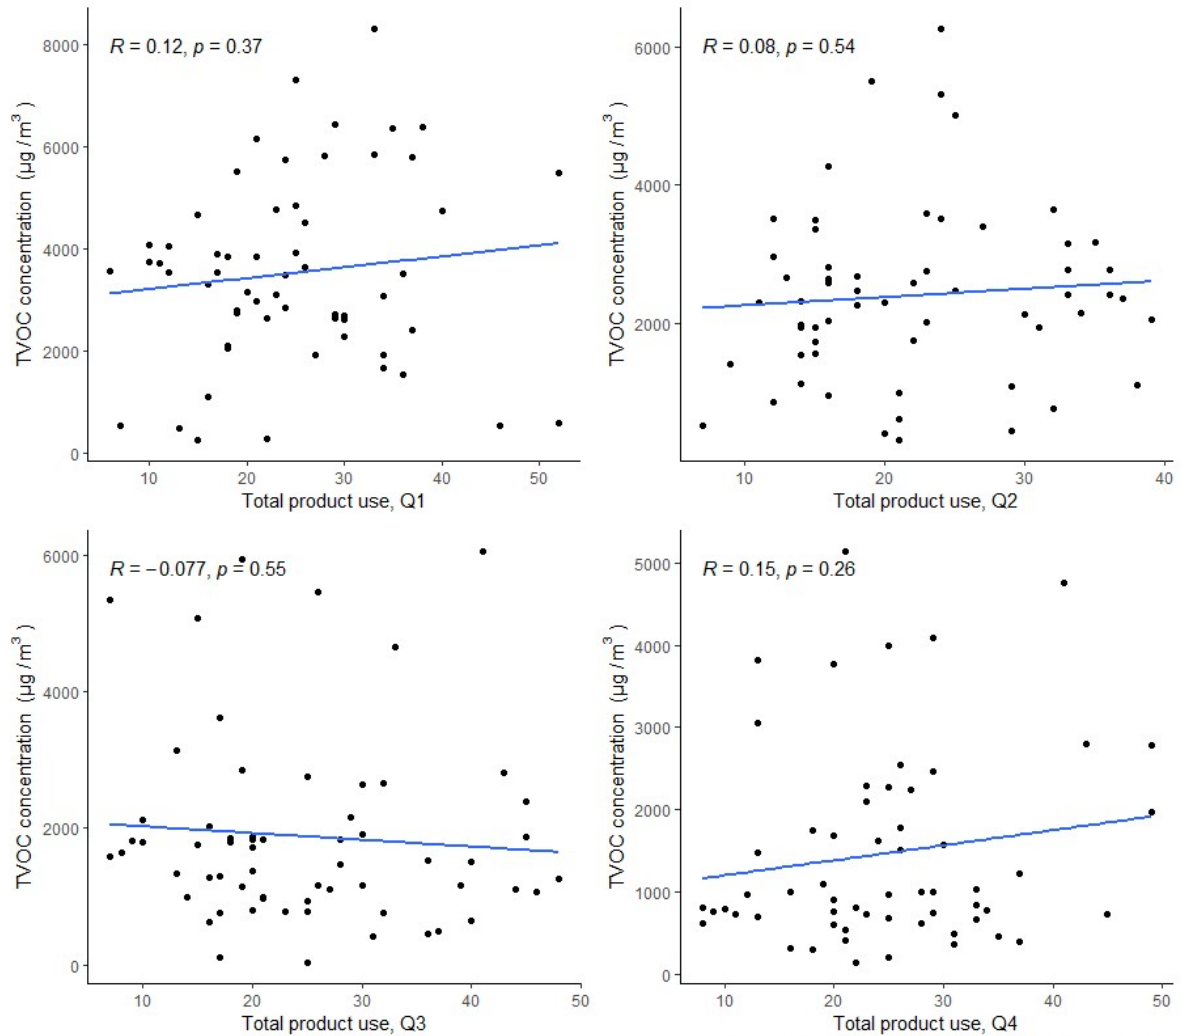

Supplement: d2em00444e1.pdf [file d2em00444e1.pdf]
